# Supplementary material for: Methylcap-Seq Reveals Novel DNA Methylation Markers for the Diagnosis and Recurrence Prediction of Bladder Cancer in a Chinese Population
Source: PLoS One. 2012 Apr 17;7(4):e35175. doi: 10.1371/journal.pone.0035175 (PMC3328468; doi:10.1371/journal.pone.0035175)
Supplement: Table S3 — The BCC and BM MBD methylCap-seq library characteristics. (XLS) [file pone.0035175.s004.xls]

## Sheet: Sheet1
Table S3. The library characteristics of the BCC and BM by MBD methylCap-seq
	BCC （5637+T24）	BM （BM1+BM2）
Reads	6232852	6230959
Total bases recalled	473696752	473552884
Base Q20	0.9143	0.909
Peaks (p value<1e-3)	210051	229538
Relative high methylated DMR	70432	83690
DMR related to refGene	55237	45522
DMR related to CGI	21179	1945
DMR related to both refGene and CGI	4256	401
DMR related to promoter	1627	66
