# Supplementary material for: Methylcap-Seq Reveals Novel DNA Methylation Markers for the Diagnosis and Recurrence Prediction of Bladder Cancer in a Chinese Population
Source: PLoS One. 2012 Apr 17;7(4):e35175. doi: 10.1371/journal.pone.0035175 (PMC3328468; doi:10.1371/journal.pone.0035175)
Supplement: Table S4 — BSP validation of methylation information in BCC and BM libraries. (XLS) [file pone.0035175.s005.xls]

## Sheet: Sheet1
Table S4. BSP validation of methylation information in BCC and BM libraries
		-10 * lg (p-value)	mCG/CG			mCG/CG (%)
			BCC	BM		BCC	BM	Consistence
DMR in BCC
1	NKX6_1	900.8	127/138	3/115		0.92	0.026	yes
2	CNTFR	829.3	103/132	2/110		0.78	0.018	yes
3	BMP7	748.6	75/144	0/144		0.521	0	yes
4	TLX1	682.7	92/156	5/156		0.59	0.032	yes
5	PLTP	621.1	47/78	5/78		0.603	0.064	yes
6	LMX1A	621.1	142/186	0/186		0.763	0	yes
7	IRX	576.2	84/144	3/144		0.583	0.021	yes
8	SIM2	549.5	97/114	3/114		0.851	0.026	yes
9	TBX20	498.7	63/90	1/90		0.7	0.011	yes
10	TUBB2B	455.3	111/120	6/144		0.925	0.042	yes
11	HS3ST3A1	440.1	114/168	0/140		0.679	0	yes
12	AVPR1A	439.8	104/130	0/130		0.8	0	yes
13	BEND4	425.7	136/150	5/180		0.907	0.028	yes
14	ADRA1A	424.3	90/105	1/126		0.857	0.008	yes
15	CDO1	423.8	49/165	3/165		0.297	0.018	yes
16	KCNV1	378.6	36/70	1/70		0.514	0.014	yes
17	PROX1	336.1	121/140	7/140		0.864	0.05	yes
18	SLC6A20	292.5	31/100	0/100		0.31	0	yes
19	ECEL1	257.6	82/110	0/110		0.745	0	yes
20	VAX1	147.6	82/102	8/68		0.804	0.118	yes
21	NOS1	89.8	49/105	15/105		0.467	0.143	yes
22	TAL1	84.5	79/95	6/95		0.832	0.063	yes
DMR IN BM
23	IRS1	197.3	0/84	51/84		0	0.607	yes
24	DAZ3	147.2	119/126	117/126		0.944	0.929	no
Notes: p-value, refer to the methylation contrast between library BCC and BM provided by of MACS softwre. Consistence, refer to the same trend of methylation between BCC and BM
