# Supplementary material for: Methylcap-Seq Reveals Novel DNA Methylation Markers for the Diagnosis and Recurrence Prediction of Bladder Cancer in a Chinese Population
Source: PLoS One. 2012 Apr 17;7(4):e35175. doi: 10.1371/journal.pone.0035175 (PMC3328468; doi:10.1371/journal.pone.0035175)
Supplement: Table S5 — The receiver operating characteristics of the informative gene panel for bladder cancer detection. (XLS) [file pone.0035175.s006.xls]

## Sheet: Sheet1
Table S5. Receiver operating characteristics of the informative gene panel for bladder cancer detection
No.	Gene target sets	TP/FN	FP/TN	P	SN	SP	PPV	NPV	ACC	AUC
		n=212	n=149		(%)	(%)	(%)	(%)	(%)
1	VAX1	90/122	7/142	< 0.0001	42.45	95.3	92.78	53.79	64.27	0.689
2	VAX1 KCNV	144/68	15/134	< 0.0001	67.92	89.93	90.57	66.34	77.01	0.789
3	VAX1 KCNV PROX1	156/56	16/133	< 0.0001	73.58	89.26	90.7	70.37	80.06	0.808
4	VAX1 KCNV PROX1 TAL1	163/49	17/132	< 0.0001	76.89	88.59	90.56	72.93	81.72	0.824
5	VAX1 KCNV PROX1 TAL1 ECEL1	167/45	20/129	< 0.0001	78.77	86.58	89.3	74.14	81.99	0.821
6	VAX1 KCNV PROX1 TAL1 ECEL1 SLC6A20	170/42	23/126	< 0.0001	80.19	84.56	88.08	75	81.99	0.82
7	VAX1 KCNV PROX1 TAL1 ECEL1 SLC6A20 TMEM26	171/41	27/122	< 0.0001	80.66	81.88	86.36	74.85	81.16	0.813
8	VAX1 KCNV PROX1 TAL1 ECEL1 SLC6A20 TMEM26 LMX1A	172/40	28/121	< 0.0001	81.13	81.21	86	75.16	81.16	0.812
NOTE:The first column is the list of each gene set. The second is the true positive ( the bladder cancer case having at least one gene methylated) and false negative (the bladder cancer case having no gene methylated) events in the bladder cancer cohort. The third is the false positve (the noncancerous urinary lesion cases having at least one gene methylated) and true negative ( the noncancerous …
